# Supplementary material
Source: PubMed Central journal article supplement (PMC9637808)
Supplement: mmc1.pdf [file mmc1.pdf]

**Supplemental Information**

**BET inhibition triggers antitumor immunity  
by enhancing MHC class I expression in  
head and neck squamous cell carcinoma**

**Ming Zhang, Ganping Wang, Zhikun Ma, Gan Xiong, Wenjin Wang, Zhengxian Huang, Yuehan Wan, Xiuyun Xu, Rosalie G. Hoyle, Chen Yi, Jinsong Hou, Xiqiang Liu, Demeng Chen, Jiong Li, and Cheng Wang**

Figure S1

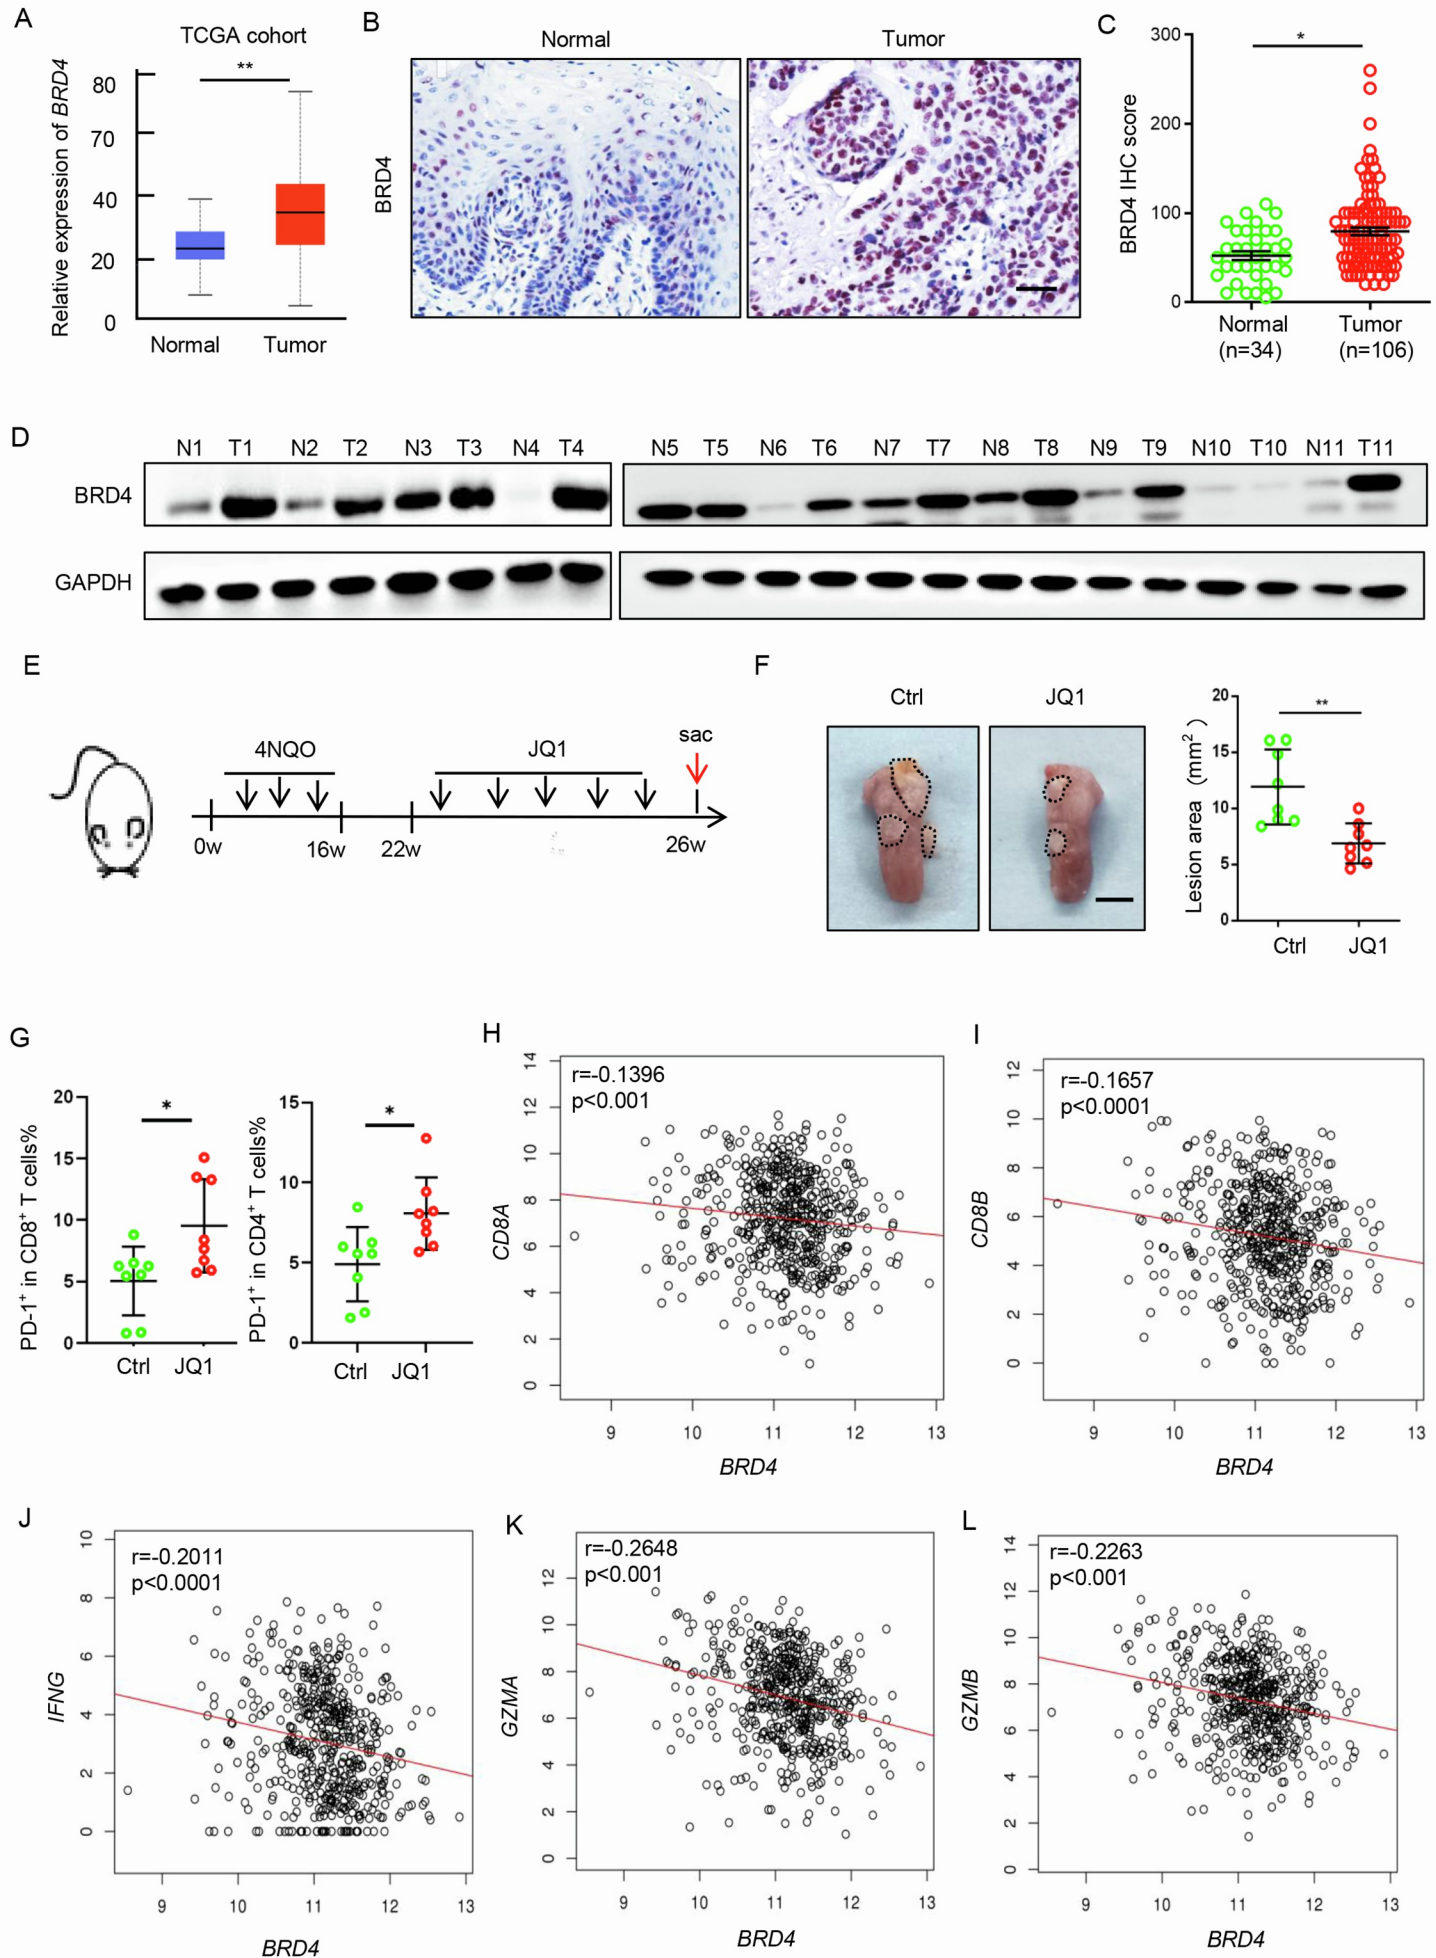

**Figure S1. BRD4 expression is increased and inversely correlated with *CD8A*, *CD8B*, *IFNG*, *GZMA* and *GZMB* expression in HNSCC, Related to Figure 1**

- (A) The expression level of *BRD4* mRNA in TCGA HNSCC database.
- (B) Representative immunostaining of BRD4 in human HNSCC samples. Scale bar, 50  $\mu$ m.
- (C) The expression of BRD4 in human HNSCC samples. \* $p < 0.05$  by Student's t test.
- (D) The expression of BRD4 protein in human HNSCC samples and their corresponding normal tissue detected by western blot.
- (E) Experimental design for JQ1 treatment in 4NQO-induced HNSCC mice model.
- (F) JQ1 treatment attenuates growth of murine HNSCC tumors in 4NQO-induced HNSCC mice. Values are means  $\pm$  SD from the pool of 3 independent experiments.  $n=8$ . \*\* $p < 0.01$  by Student's t test. Scale bar, 3 mm.
- (G) More CD8<sup>+</sup> T cells and CD4<sup>+</sup> T cells expressed PD-1 in TILs from 4NQO-induced HNSCC mice upon JQ1 treatment. \* $p < 0.05$  by Student's t test.
- (H-L) *BRD4* expression was inversely correlated with the expression of *CD8A*, *CD8B*, *IFNG*, *GZMA* and *GZMB* in human HNSCC from TCGA database.

Figure S2

A

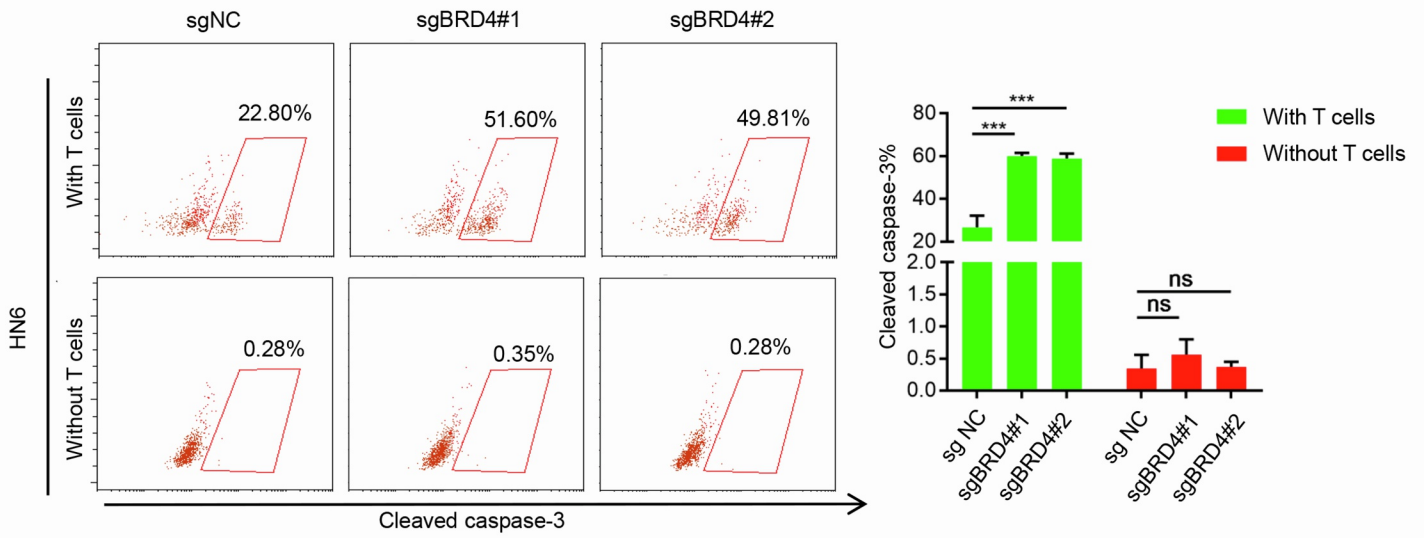

B

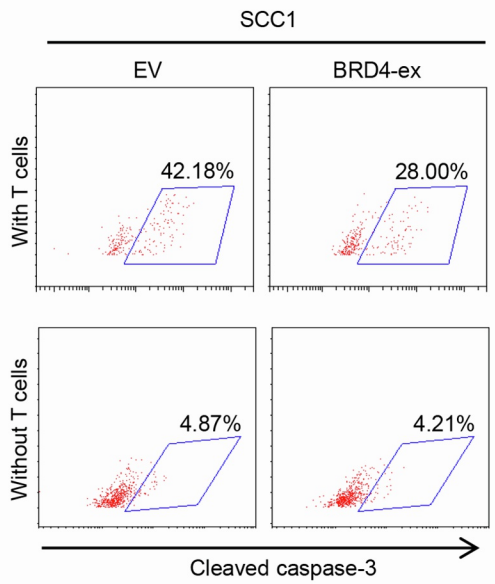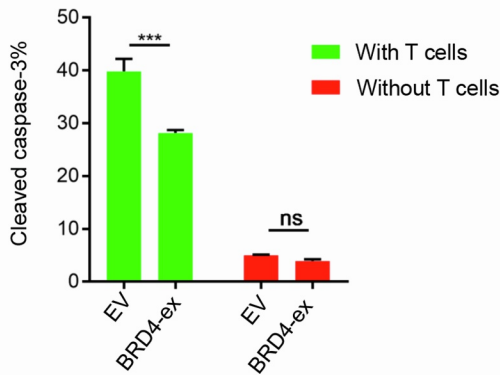

C

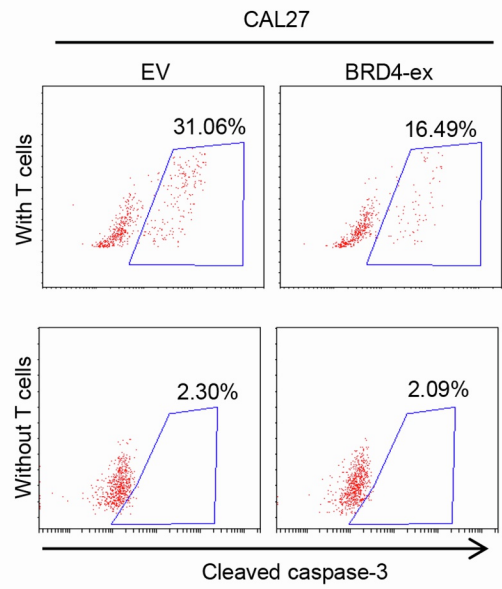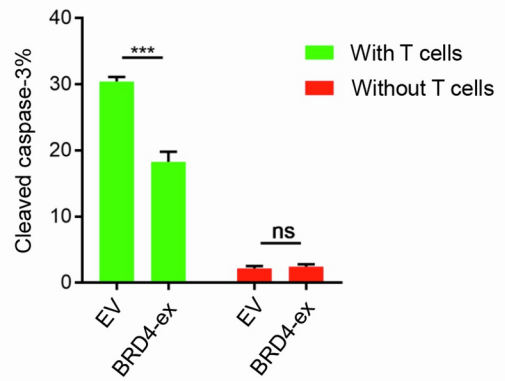

**Figure S2. Modulation of BRD4 in HNSCC cells regulates the cytotoxicity of T cells, Related to Figure 3**

- (A) Representative image and quantification of cleaved caspase-3 positive cells in HN6 cells with genetic depletion *BRD4*. \*\*\* $p < 0.001$  by 2-way ANOVA. ns, non-significant.
- (B) Representative image and quantification of cleaved caspase-3 positive cells in SCC1 cells with ectopic overexpression of *BRD4*. \*\*\* $p < 0.001$  by 2-way ANOVA. ns, non-significant.
- (C) Representative image and quantification of cleaved caspase-3 positive cells in CAL27 cells with ectopic overexpression of *BRD4*. \*\*\* $p < 0.001$  by 2-way ANOVA. ns, non-significant.

Figure S3

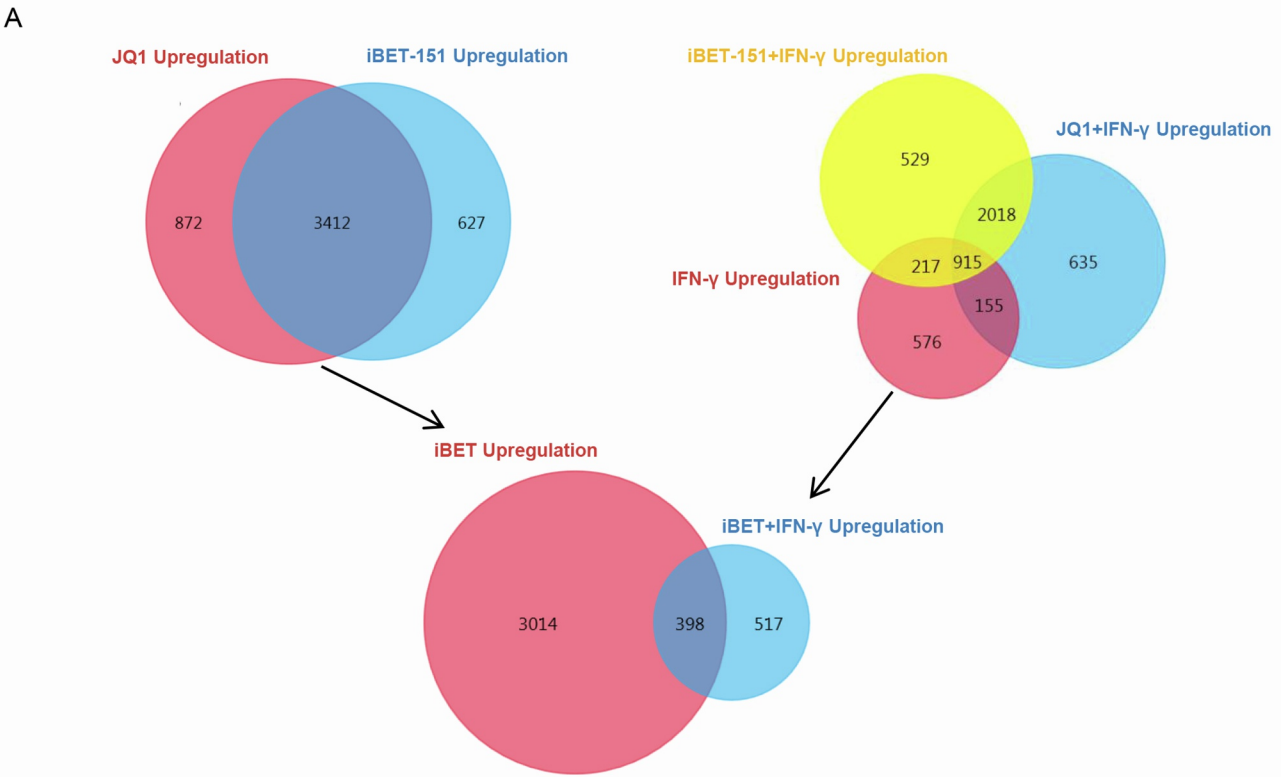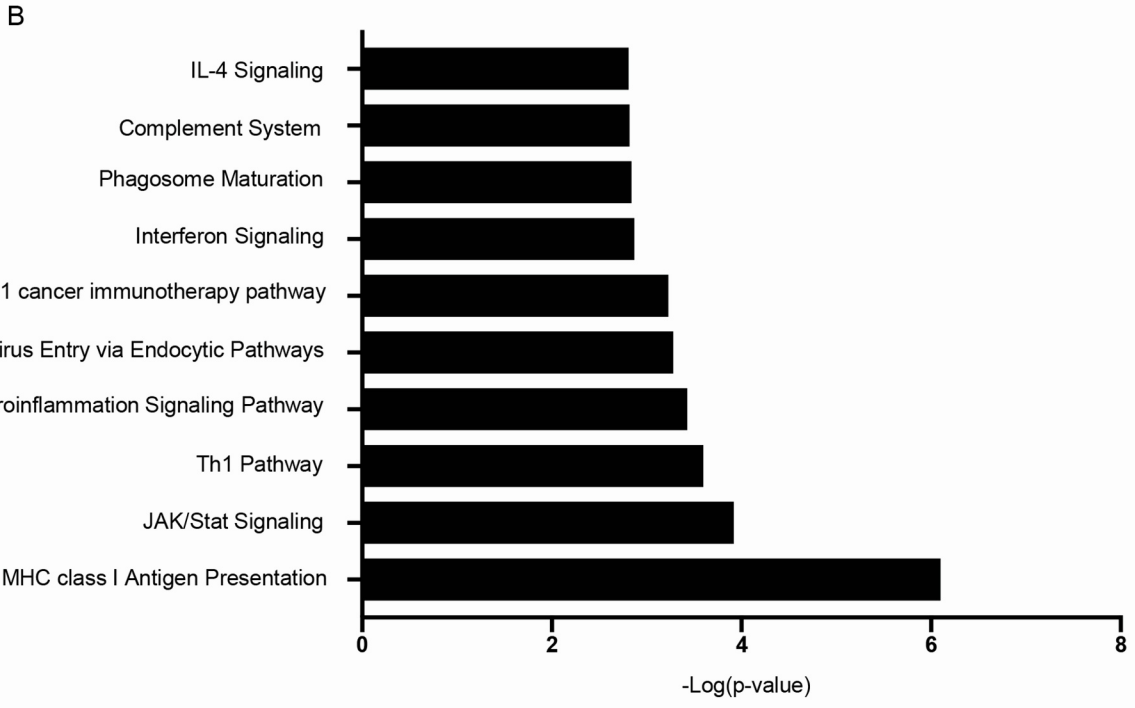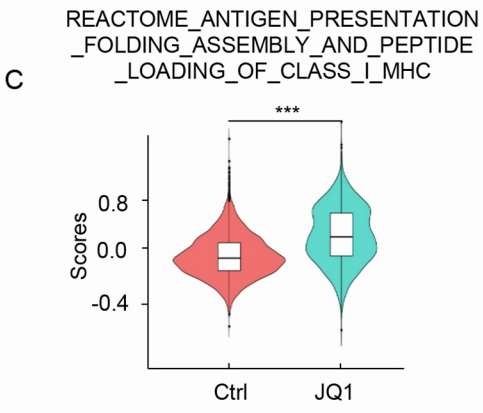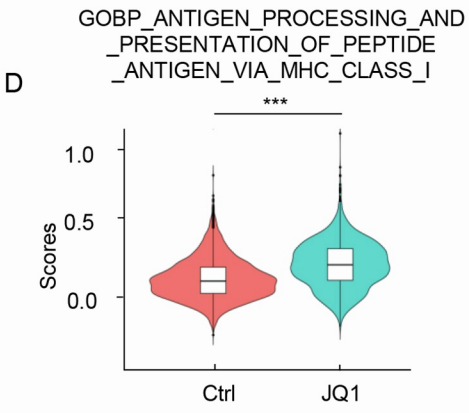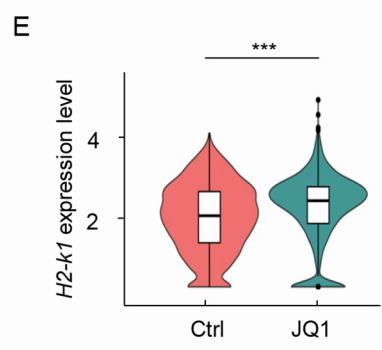

**Figure S3. Targeting BRD4 promotes expression of MHC-I expression in HNSCC, Related to Figure 4**

(A) RNA-seq analysis showed the genes commonly upregulated by JQ1 and iBET-151 in the presence or absence of IFN- $\gamma$  in SCC1 cells.

(B) IPA analysis showed the canonical pathways which were correlated the genes commonly upregulated by JQ1 and iBET-151 in the presence or absence of IFN- $\gamma$  in SCC1 cells.

(C and D) Violin plot of MHC class I antigen processing and presentation related gene signature scores in the two epithelial clusters. \*\*\* $p < 0.001$  by Wilcoxon rank-sum test.

(E) Violin plot showing the expression of *H2-K1* in the two epithelial clusters. \*\*\* $p < 0.001$  by Wilcoxon rank-sum test.

Figure S4

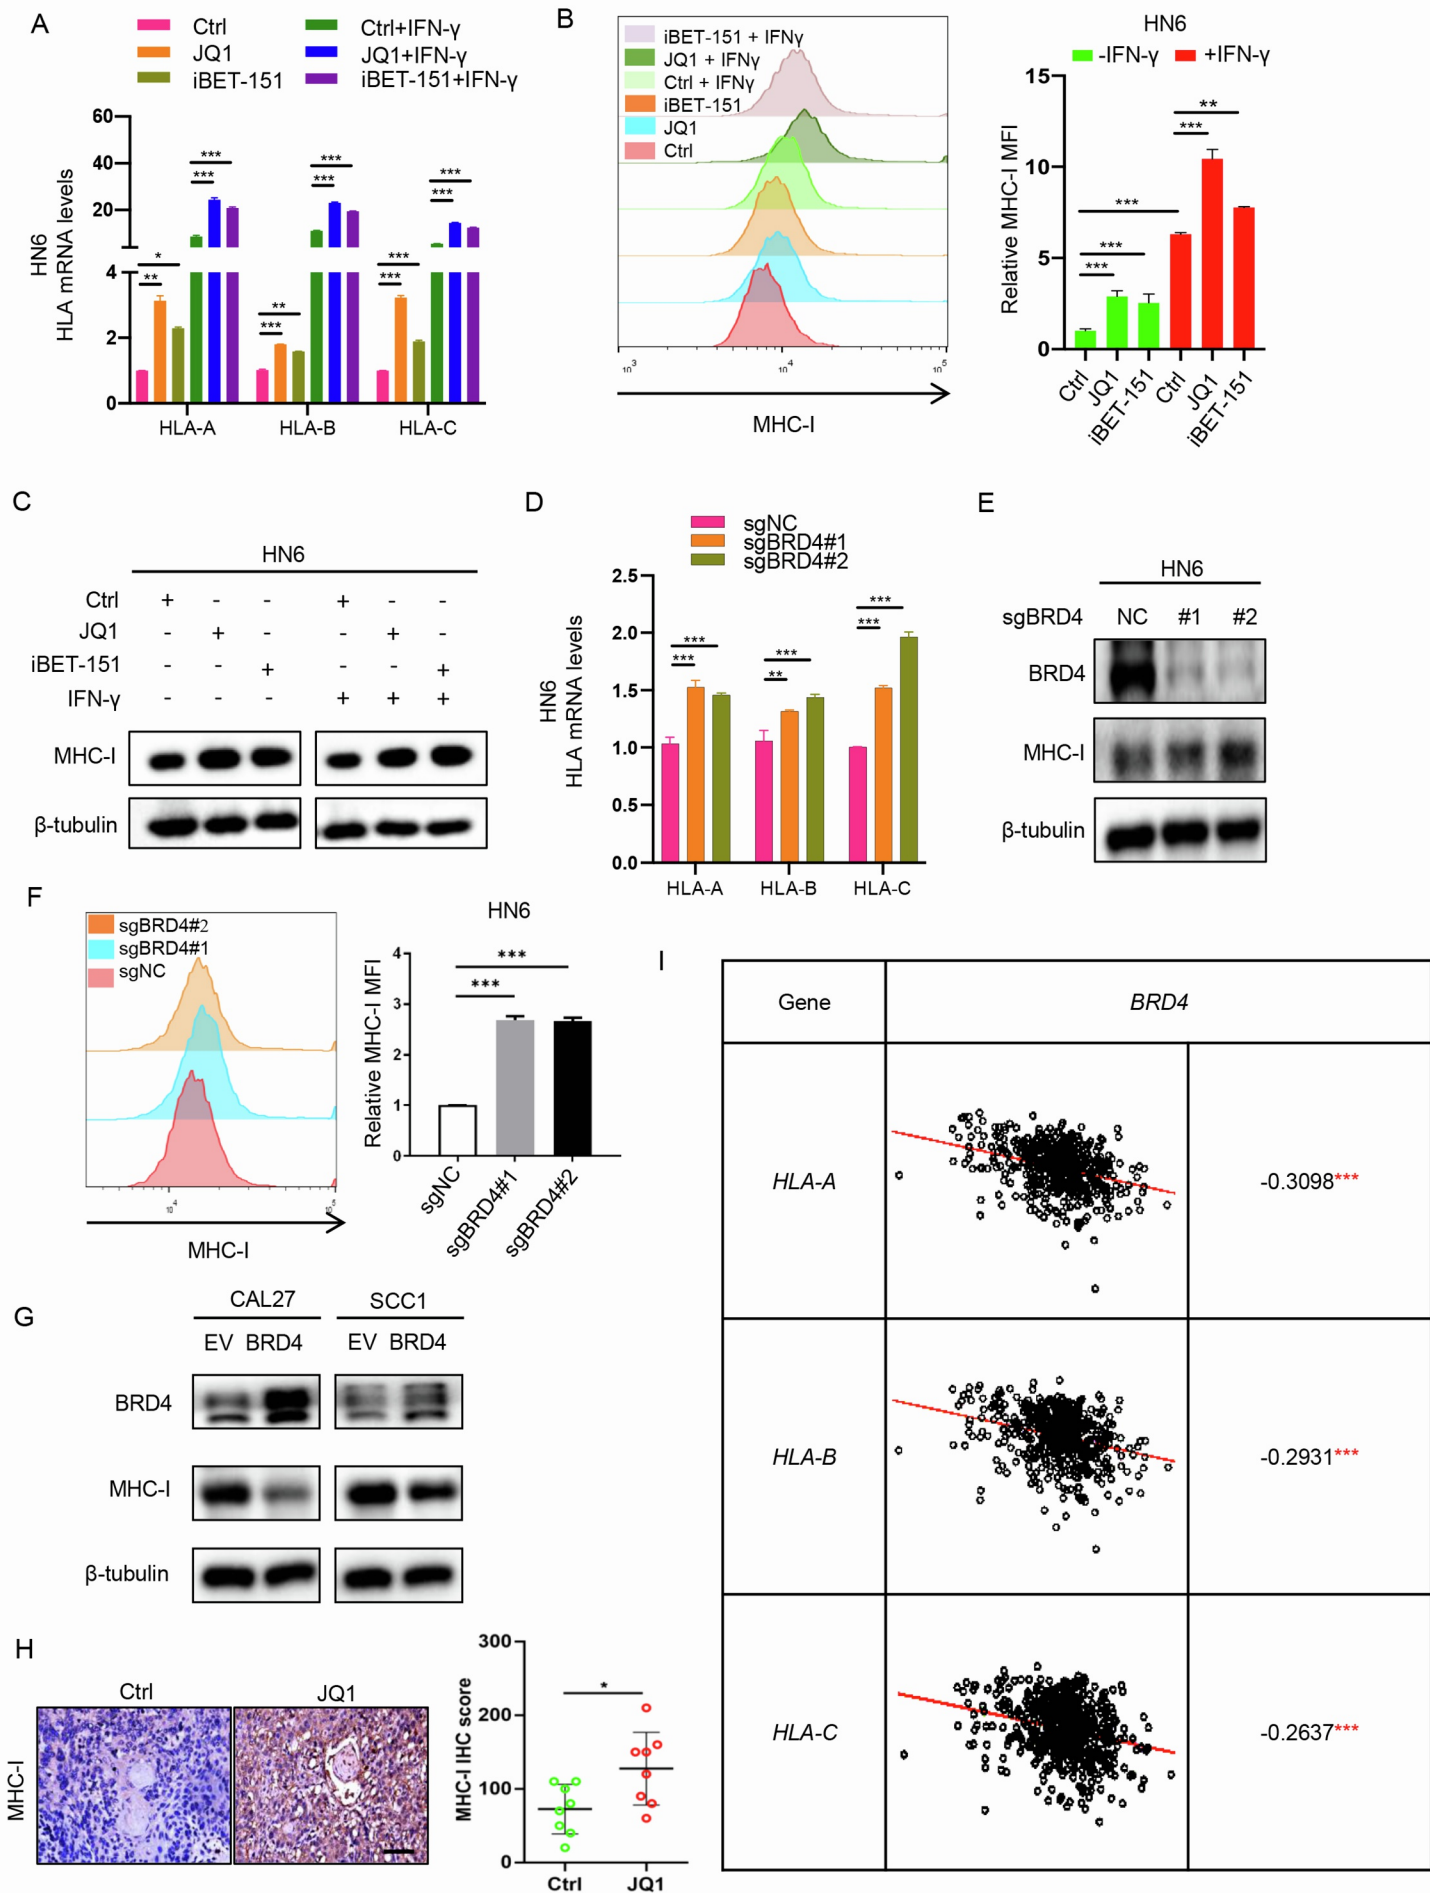



**Figure S4. BRD4 regulates the expression of MHC-I expression in HNSCC cells, Related to Figure 4**

- (A) RT-qPCR showing the expression of *HLA-A*, *HLA-B* and *HLA-C* in HN6 cells treated with JQ1 and iBET-151 in the presence or absence of IFN- $\gamma$ . Means  $\pm$  SDs were shown. \* $p < 0.05$ , \*\* $p < 0.01$  and \*\*\* $p < 0.001$  by 1-way ANOVA.
- (B) Flow Cytometry displayed cell surface MHC-I expression in HN6 cells treated with JQ1 and iBET-151 in the presence or absence of IFN- $\gamma$ . Means  $\pm$  SDs were shown. \*\* $p < 0.01$  and \*\*\* $p < 0.001$  by 1-way ANOVA.
- (C) Immunoblot showing the expression of MHC-I in HN6 cells treated with JQ1 and iBET-151 in the presence or absence of IFN- $\gamma$ .
- (D) RT-qPCR showed that the expression of *HLA-A*, *HLA-B* and *HLA-C* in HN6 cells transfected with sg*BRD4*. Means  $\pm$  SDs were shown. \*\* $p < 0.01$  and \*\*\* $p < 0.001$  by 1-way ANOVA.
- (E) Immunoblot showed that the expression of MHC-I in HN6 cells transfected with sg*BRD4*.
- (F) Flow Cytometry displayed cell surface MHC-I expression in HN6 cells transfected with sg*BRD4*. Means  $\pm$  SDs were shown. \*\*\* $p < 0.001$  by 1-way ANOVA.
- (G) Immunoblot showed that the expression of MHC-I in SCC1 and CAL27 cells transfected with *BRD4* overexpression vectors.
- (H) Immunostaining for MHC-I in murine primary HNSCC from 4NQO-induced mice treated with or without JQ1. \* $p < 0.05$  by Student's t test.
- (I) The expression of *BRD4* was inversely correlated with *HLA-A*, *HLA-B* and *HLA-C* expression based on TCGA HNSCC dataset.

Figure S5

A

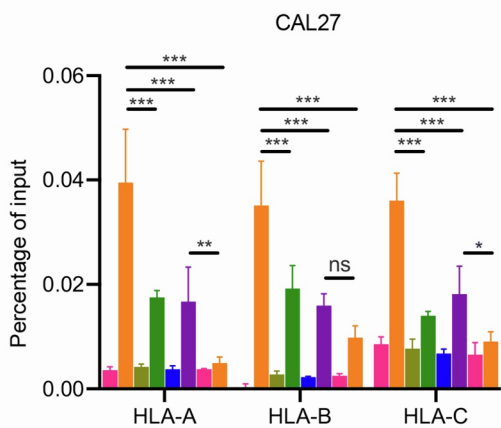

ChIP  
 IgG  
 BRD4  
 IgG  
 BRD4  
 IgG  
 BRD4

F

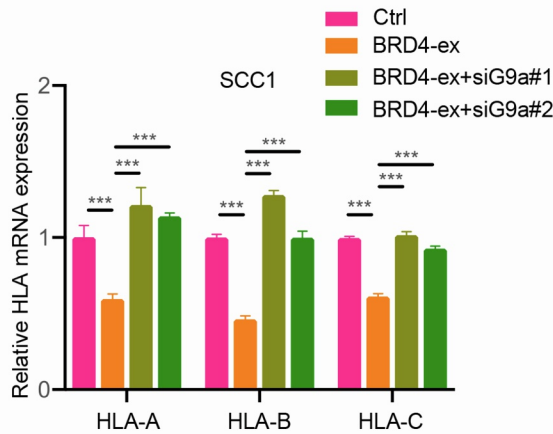

B

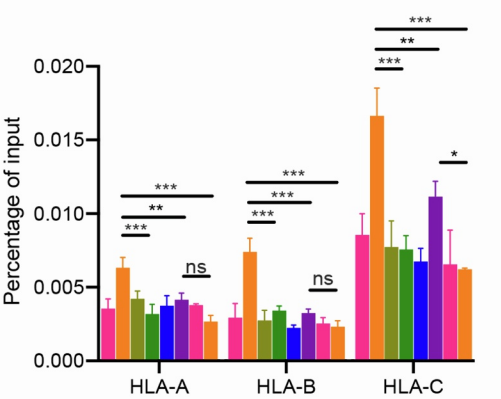

ChIP  
 IgG  
 G9a  
 IgG  
 G9a  
 IgG  
 G9a

G

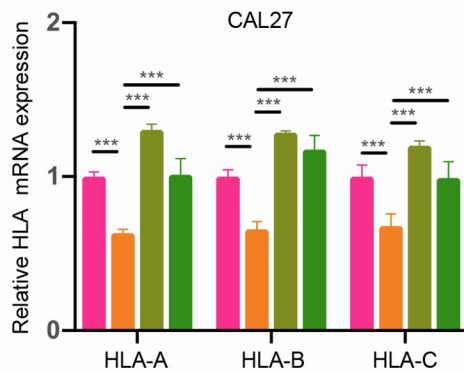

C

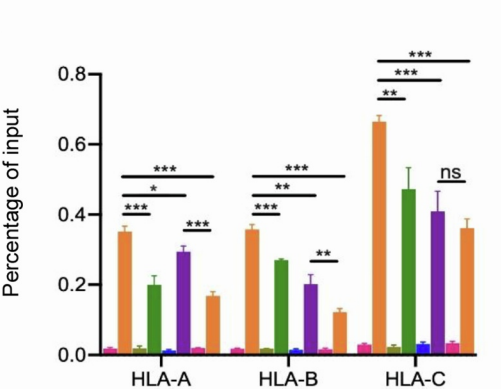

ChIP  
 IgG  
 H3K9me1  
 IgG  
 H3K9me1  
 IgG  
 H3K9me1

D

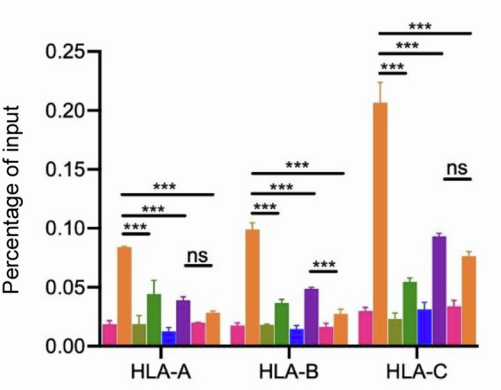

ChIP  
 IgG  
 H3K9me2  
 IgG  
 H3K9me2  
 IgG  
 H3K9me2

E

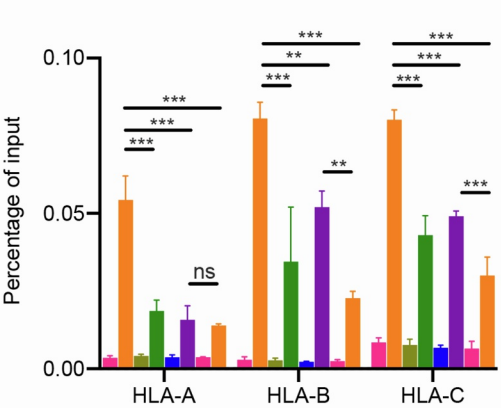

ChIP  
 IgG  
 H3K9me3  
 IgG  
 H3K9me3  
 IgG  
 H3K9me3

H

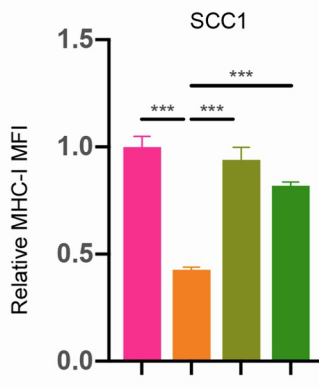

I

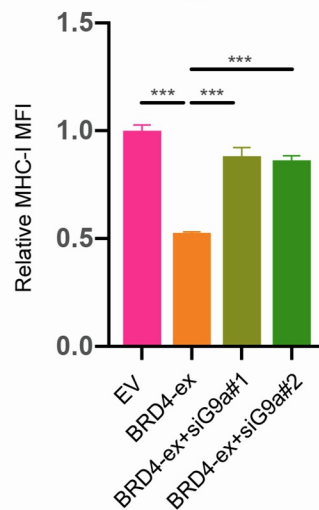

**Figure S5. BRD4 inhibition enhanced MHC-I expression via suppressing G9a in HNSCC, Related to Figure 5**

(A-E) CAL27 cells treated with JQ1 and/or IFN- $\gamma$  were subjected to ChIP assay with BRD4, G9a, H3K9me1, H3K9me2 and H3K9me3 antibodies. \* $p < 0.05$ , \*\* $p < 0.01$  and \*\*\* $p < 0.001$  by 1-way ANOVA. ns, non-significant.

(F) RT-qPCR showed that the expression of *HLA-A*, *HLA-B* and *HLA-C* in SCC1 and CAL27 cells overexpressing *BRD4* and/or transfected with *G9a* siRNAs. \*\*\* $p < 0.001$  by 1-way ANOVA.

(G) Flow Cytometry displayed cell surface MHC-I in SCC1 and CAL27 cells overexpressing *BRD4* and/or transfected with siRNA targeting *G9a*. \*\*\* $p < 0.001$  by 1-way ANOVA.

Figure S6

A

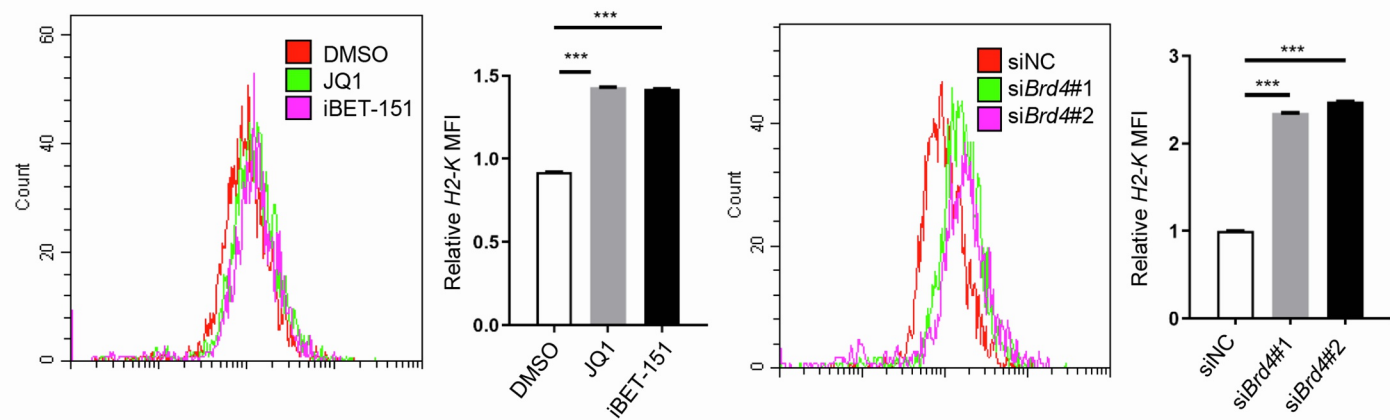

B

Effect cells: OT1 CD8<sup>+</sup> T cells Target cells: B16-OVA cells

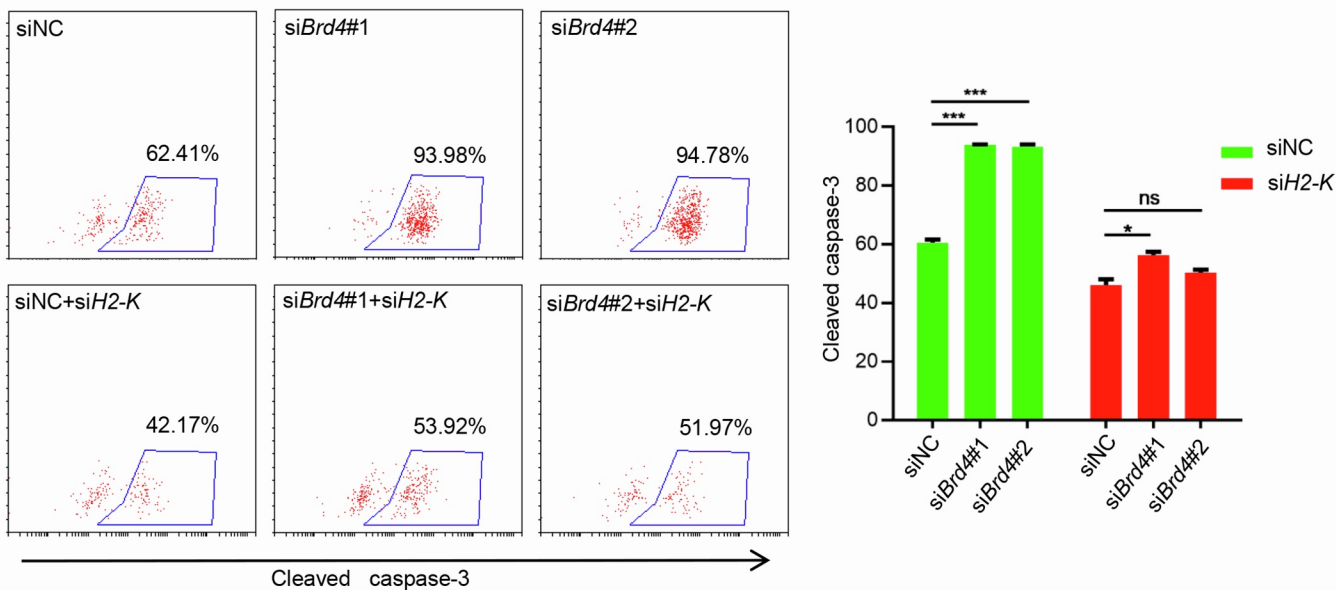

C

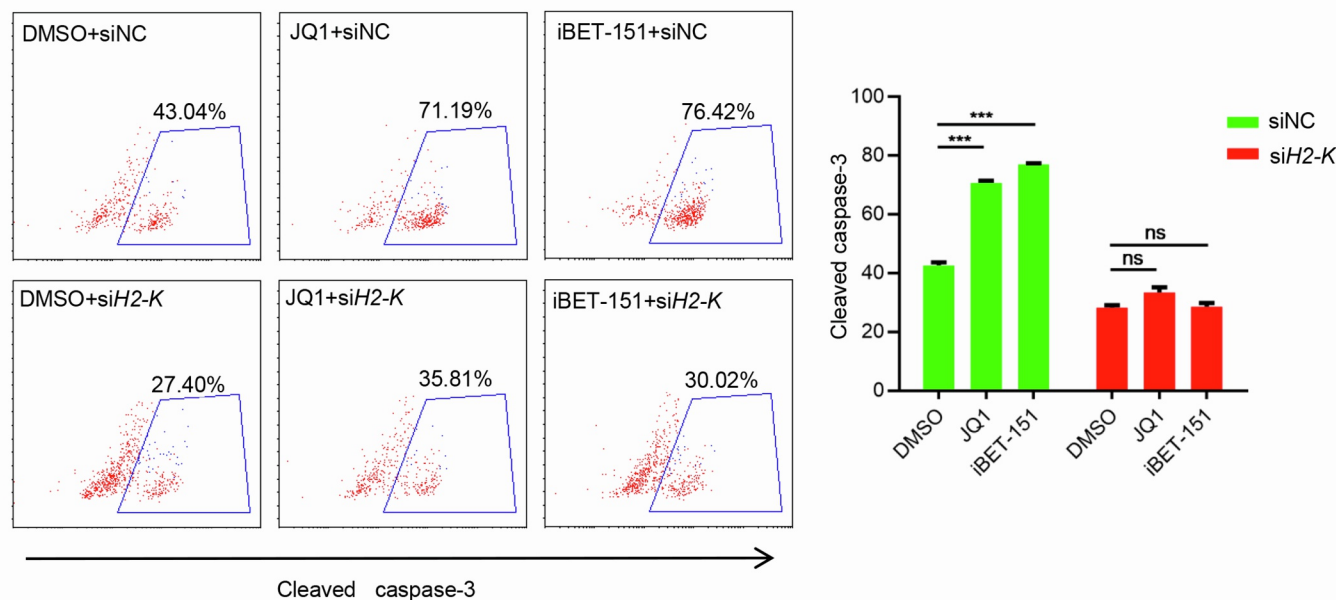

**Figure S6. Pharmacological inhibition and knockdown of BRD4 in B16-OVA cells enhance cytotoxicity of OT-1 cells by modulating MHC-I *in vitro*, Related to Figure 6**

(A) Flow Cytometry showed that the expression of MHC-I (*H2-K*) in B16/F10 cells upon JQ1 or iBET-151 treatment and transfected with *Brd4* siRNAs. \*\*\* $p < 0.001$  by 1-way ANOVA.

(B) Image and Quantification of cleaved caspase-3 positive cells in B16-OVA cells treated with *siBrd4* and *siH2-K* co-cultured with OT-1 cells. \* $p < 0.05$  and \*\*\* $p < 0.001$ , by 2-way ANOVA; ns, non-significant.

(C) Image and Quantification of cleaved caspase-3 positive cells in B16-OVA cells treated with JQ1 or iBET-151 and *siH2-K* co-cultured with OT-1 cells. \*\*\* $p < 0.001$  by 2-way ANOVA; ns, non-significant.

Figure S7

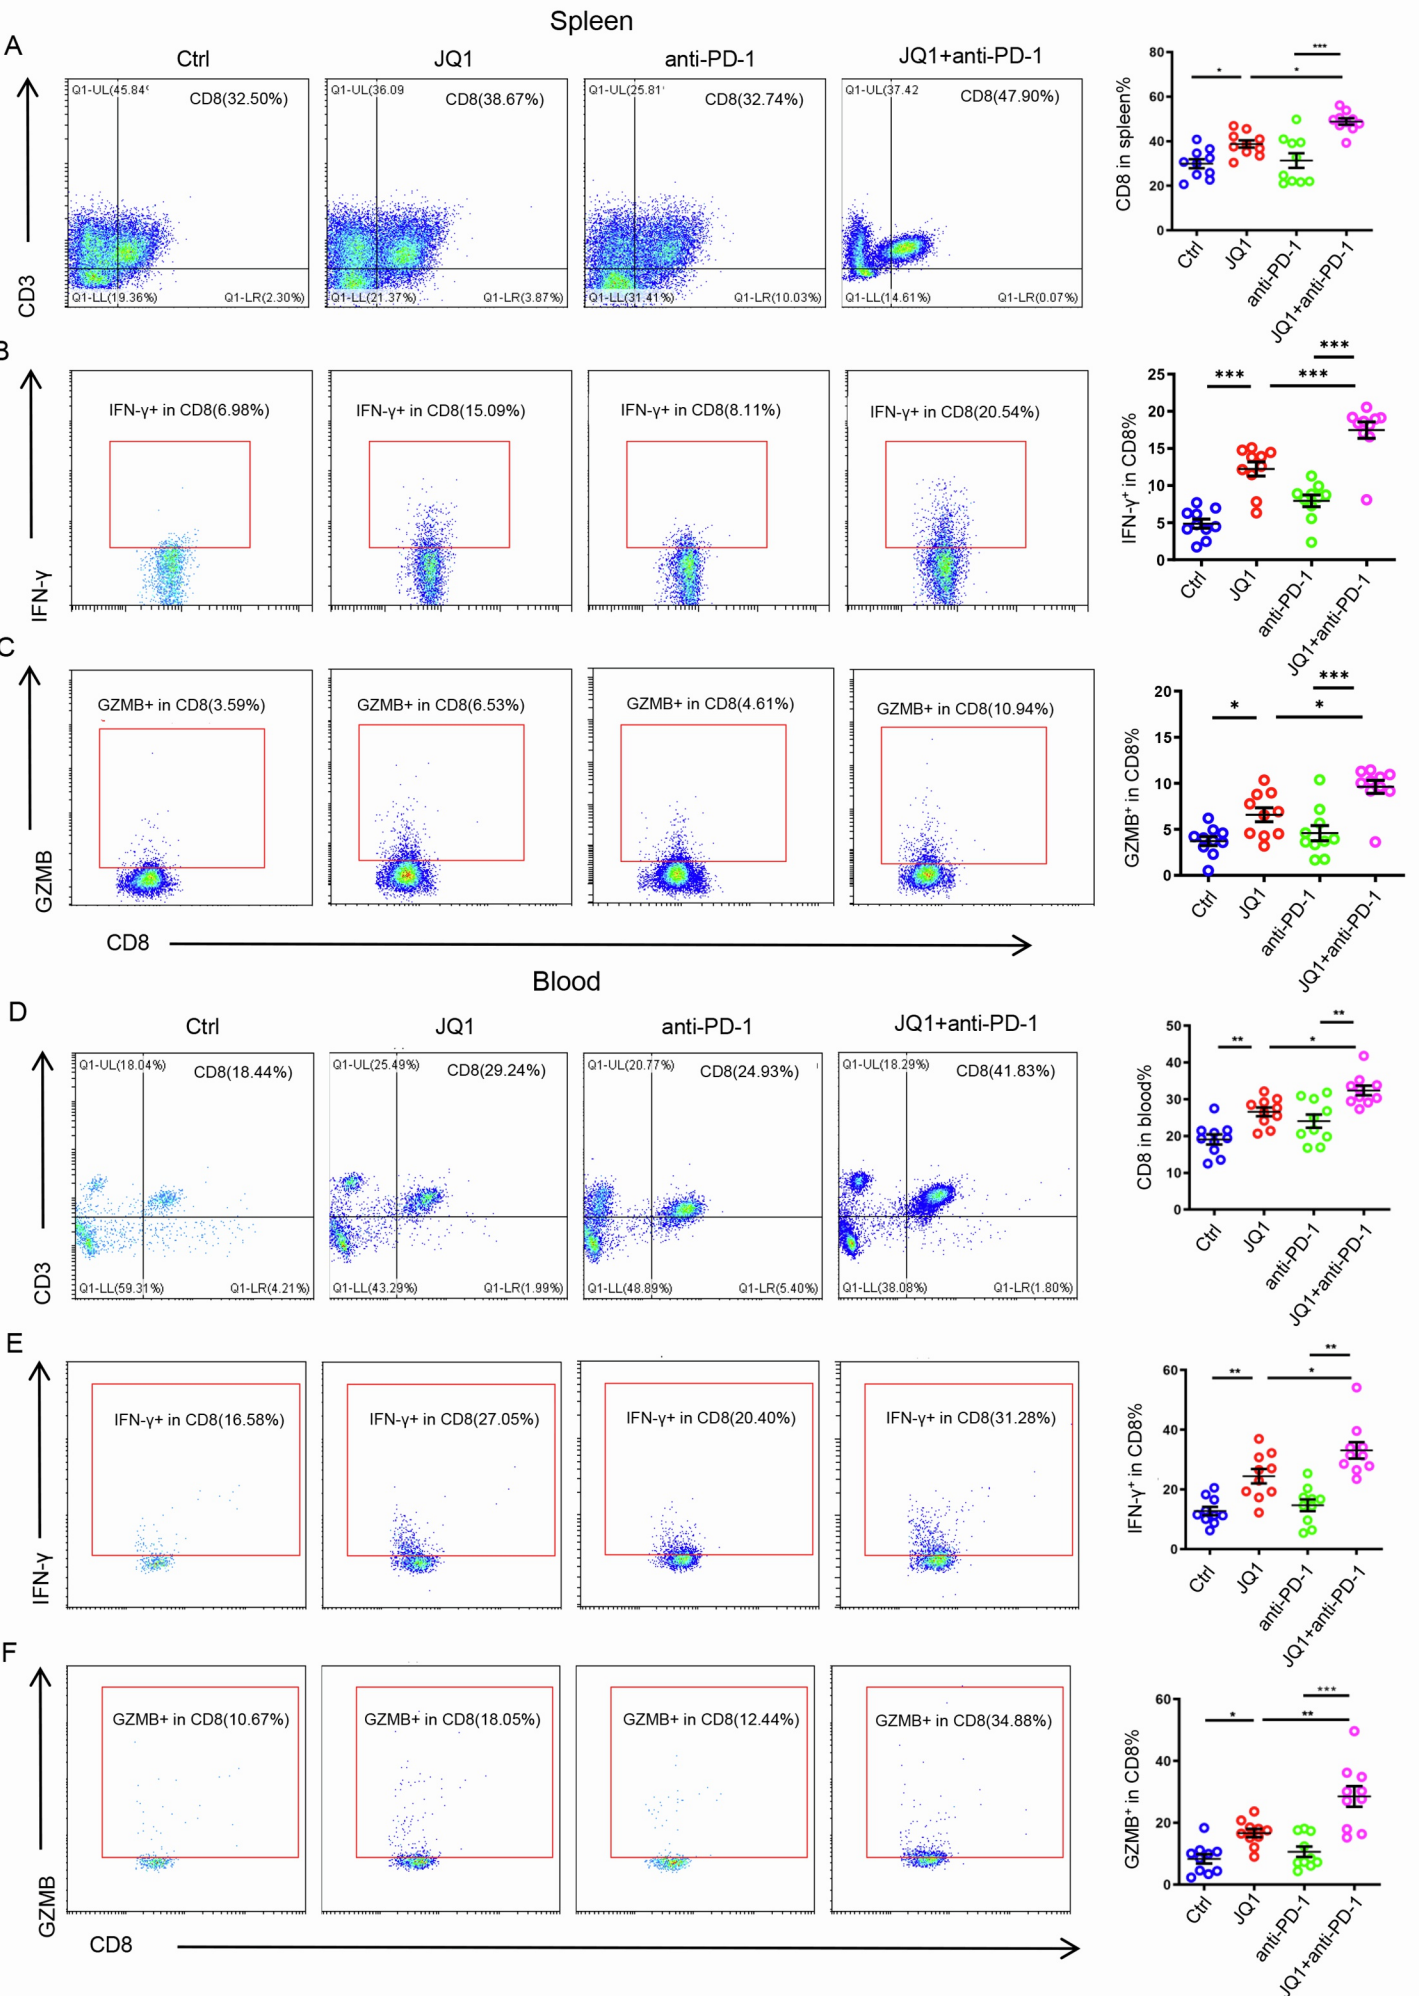

**Figure S7. BET inhibition enhances the sensitivity of anti-PD-1 treatment in HNSCC with alterations of CD8<sup>+</sup> T cells in the spleen and peripheral blood, Related to Figure 7**

(A) Percentage of CD8<sup>+</sup> T cells in the spleen from mice upon different treatment as indicated. n=10. \*p < 0.05 and \*\*\*p < 0.001 by 1-way ANOVA.

(B) Percentage of intracellular staining of IFN-γ in CD8<sup>+</sup> T cells from spleen of mice upon different treatment as indicated. n=10. \*p < 0.05 and \*\*\*p < 0.001 by 1-way ANOVA.

(C) Percentage of intracellular staining of Granzyme B in CD8<sup>+</sup> T cells from spleen of mice upon different treatment as indicated. n=10. \*p < 0.05 and \*\*\*p < 0.001 by 1-way ANOVA.

(D) Percentage of CD8<sup>+</sup> T cells in the peripheral blood from mice upon different treatment as indicated. n=10. \*p < 0.05 and \*\*p < 0.01 by 1-way ANOVA.

(E) Percentage of intracellular staining of IFN-γ in CD8<sup>+</sup> T cells from peripheral blood of mice upon different treatment as indicated. n=10. \*p < 0.05 and \*\*p < 0.01 by 1-way ANOVA.

(F) Percentage of intracellular staining of Granzyme B in CD8<sup>+</sup> T cells from peripheral blood of mice upon different treatment as indicated. n=10. \*p < 0.05, \*\*p < 0.01 and \*\*\*p < 0.001 by 1-way ANOVA.

## Tables

**Table S1. Sequences for sgRNA and siRNA**

| Gene                 | Target sequences                |
|----------------------|---------------------------------|
| Human sgRNA          |                                 |
| <i>hBRD4</i> sgRNA1  | 5'-ACGCTCCTCTTTCTCCCGAG-3'      |
| <i>hBRD4</i> sgRNA2  | 5'-CTTTCTCCCGAGCGGCGCGG-3'      |
| Human siRNA          |                                 |
| <i>hMHC-I</i> siRNA1 | 5'-CCUACGACGGCAAGGAUUAdTdT-3'   |
| <i>hMHC-I</i> siRNA2 | 5'-GCUACUACAACCAGAGCGAdTdT-3'   |
| <i>hG9a</i> siRNA1   | 5'-GGAUGAAUCUGAGAAUCUUdTdT-3'   |
| <i>hG9a</i> siRNA2   | 5'-GAGUGAUGAUGUCCACUCAdTdT-3'   |
| Mouse sgRNA          |                                 |
| <i>mBrd4</i> sgRNA1  | 5'-TGGGATCACTAGCATGTCTA-3'      |
| <i>mBrd4</i> sgRNA2  | 5'-ACTAGCATGTCTACGGAGAG-3'      |
| Mouse siRNA          |                                 |
| <i>H2-K</i> siRNA1   | 5'-UAUGAGAAGACAUUGUCUGUCdTdT-3' |
| <i>H2-K</i> siRNA2   | 5'-AACAAUCAAGGUUACAUUCAdTdT-3'  |

**Table S2. Primers for RT-qPCR and ChIP-PCR**

| Gene                  | Forward                  | Reverse                |
|-----------------------|--------------------------|------------------------|
| RT-qPCR primers       |                          |                        |
| <i>HLA-A</i>          | AAAAGGAGGGAGTTACTACTCAGG | GCTGTGAGGGACACATCAGAG  |
| <i>HLA-B</i>          | GGGATGGCGAGGACCAAC       | ACAGCTCCGATGACCACAAC   |
| <i>HLA-C</i>          | CTGTCCTGGTTGTCCTAGCTGT   | TGAGAGCAGCTCCCTCCTTTT  |
| <i>BRD4</i>           | GTCCTATGAGGAGAAGCGGC     | GACGGCTTCAGGGTCTCAA    |
| <i>G9a</i>            | CAAGATTGACCGCATCAGCG     | CAGTGGTGTGGTGGACCATGCG |
| <i>TUBB4A</i>         | TGAGATCCGAAATGGCCATA     | TAGTGACCACGGGCATAGTTG  |
| ChIP-PCR primers      |                          |                        |
| <i>HLA-A</i> promoter | GGACCCAGTTCTCACTCCCATT   | GGGTGCGTGCGGACTTTAGAAC |
| <i>HLA-B</i> promoter | GCTTCATCTCAGTGGGCTACGT   | TGTGTTCCGGTCCCAATACTCC |
| <i>HLA-C</i> promoter | GCGTCGGTCTTCTTCTCCTGAATA | GGAGACGCTGATTGGCTTCTCT |
